# Supplementary material for: Potential Prognostic Role of SPARC Methylation in Non-Small-Cell Lung Cancer
Source: PubMed Central journal article supplement (PMC7349117; doi:10.3390/cells9061523), 2020-06-22
Supplement: cells-09-01523-s001.pdf [file cells-09-01523-s001.pdf]

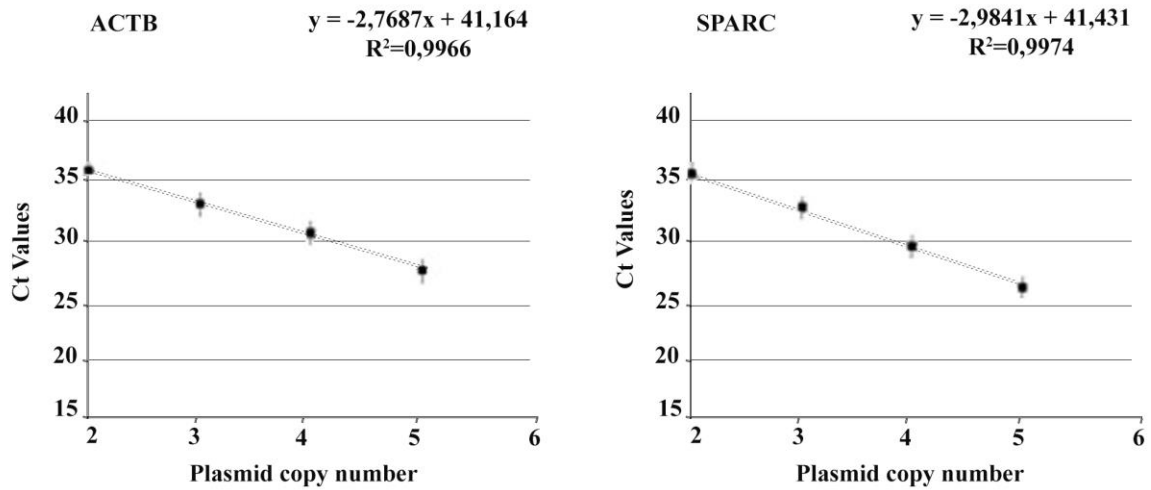

**Figure S1.** Amplification plots for *ACTB* (A) and *SPARC* gene (B) reported in the A549 cell line by QMSP.

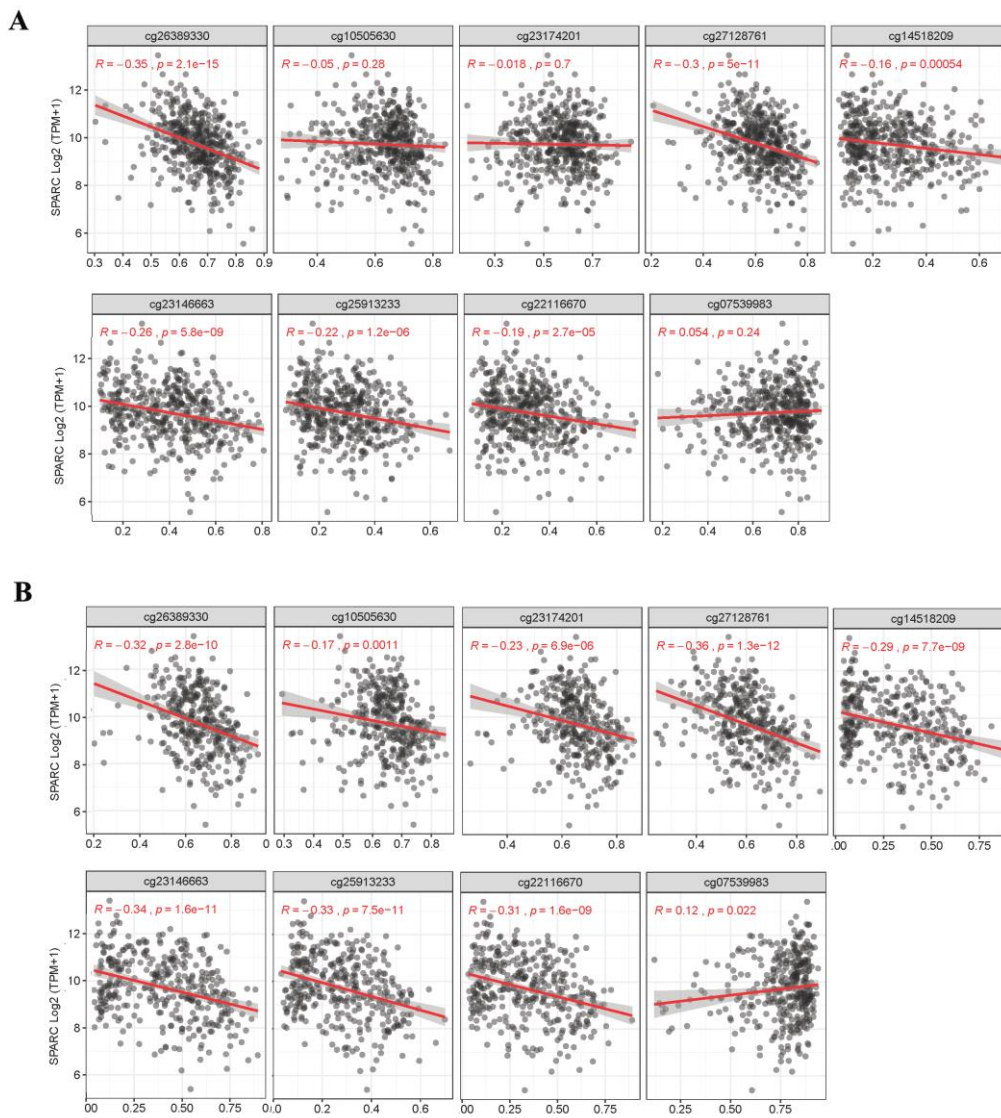

**Figure S2.** Correlation analysis between *SPARC* methylation and expression values from TCGA datasets.

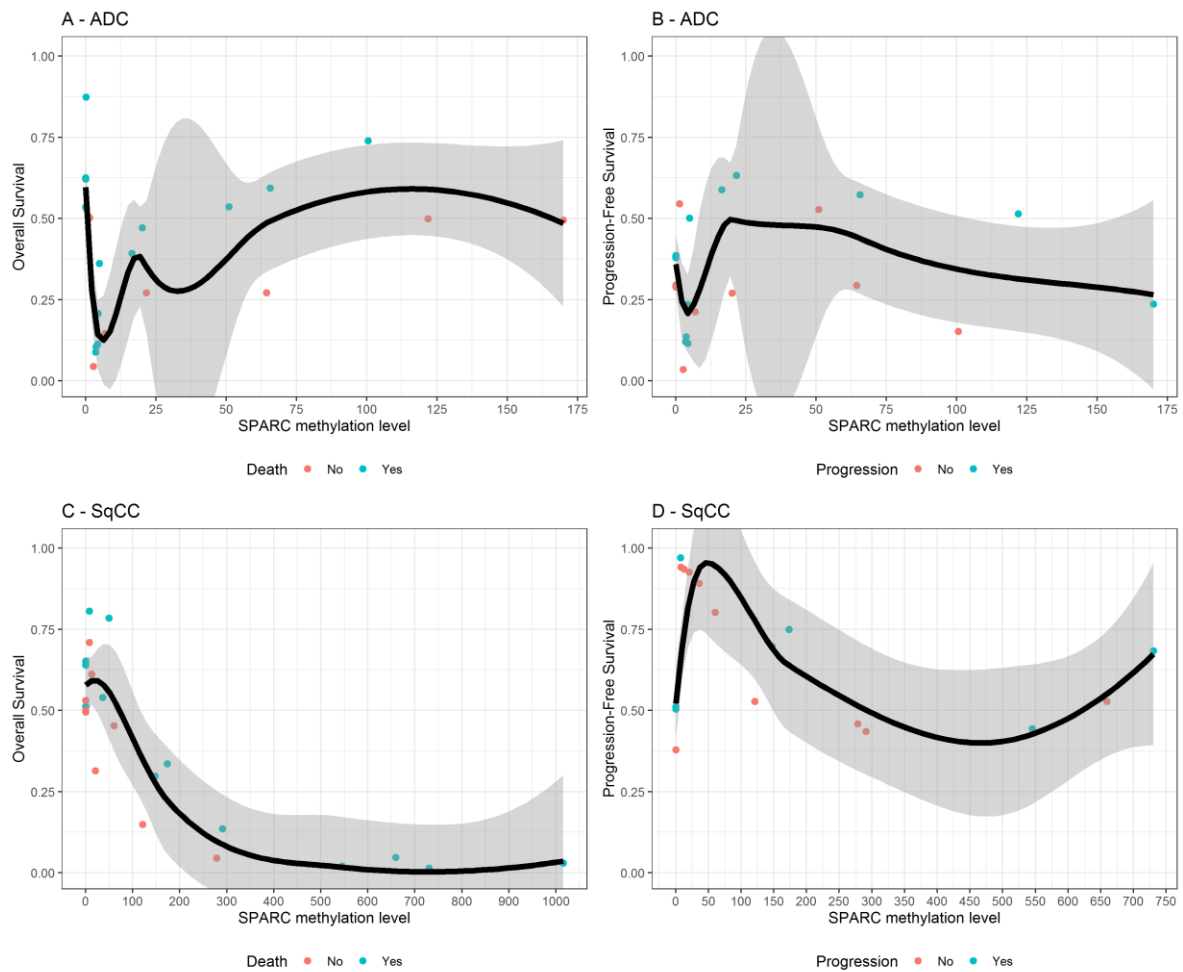

**Figure 3.** Variable dependence plots show the relationship between *SPARC* methylation levels and both the overall-survival and progression-free survival.

**Table S1.** Tumor stages, histological features and smoking habits of learning NSCLC cohort ( $n = 21$ ).

| ID cases  | Gender | Smoking status       | Histology | pTpNpM    |
|-----------|--------|----------------------|-----------|-----------|
| LCCH-881  | M      | current smoker (66)  | ADC       | pT1cN0M0  |
| LCCH-889  | F      | current smoker (40)  | ADC       | pT1aN2M0  |
| LCCH-888  | M      | never smoker (0)     | ADC       | pT1bN2M0  |
| LCCH-877  | M      | former smoker (32)   | ADC       | pT1aN0M0  |
| LCCH-876  | M      | current smoker (101) | ADC       | pT2aN0M0  |
| LCCH-1027 | M      | current smoker (80)  | SqCC      | pT1bNxM0  |
| LCCH-830  | M      | former smoker (40)   | ADC       | pT4N0M0   |
| LCCH-773  | M      | former smoker (52)   | ADC       | pT2aN0M0  |
| LCCH-1033 | F      | former smoker (40)   | ADC       | pT1bN2M1a |
| LCCH-774  | F      | former smoker (20)   | SqCC      | pT1aN0M0  |
| LCCH-903  | F      | former smoker (1)    | ADC       | pTisN0M0  |
| LCCH-944  | M      | former smoker (30)   | ADC       | pT1bN0M0  |
| LCCH-1032 | M      | former smoker (45)   | SqCC      | pT4N2M0   |

|           |   |                      |     |          |
|-----------|---|----------------------|-----|----------|
| LCCH-745  | M | current smoker (80)  | ADC | pT1aN0M0 |
| LCCH-776  | M | current smoker (103) | ADC | pT4N0M0  |
| LCCH-1028 | M | former smoker (32)   | ADC | pT1aN1M0 |
| LCCH-1029 | M | current smoker (30)  | ADC | pT3N2M0  |
| LCCH-1030 | M | current smoker (40)  | ADC | pT1cN0M0 |
| LCCH-981  | M | former smoker (62)   | ADC | pT4N0M0  |
| LCCH-1031 | M | former smoker (40)   | ADC | pT1cN1M0 |
| LCCH-842  | M | former smoker (78)   | ADC | pT1aN0M0 |

ADC, adenocarcinoma; SqCC, squamous cell carcinoma. () indicates pack/year number.

**Table S2.** Molecular alterations in *EGFR* and *KRAS* genes identified by Sanger sequencing in NSCLC samples.

| ID case  | Histology | <i>EGFR</i><br>status | <i>EGFR</i>                  |                              | <i>KRAS</i> status | <i>KRAS</i>                  |                              |
|----------|-----------|-----------------------|------------------------------|------------------------------|--------------------|------------------------------|------------------------------|
|          |           |                       | nucleotidic change/aa change | nucleotidic change/aa change |                    | nucleotidic change/aa change | nucleotidic change/aa change |
| LCCH-18  | ADC       | wt                    |                              | wt                           | mut                | c.34 G>C/p.G12R              |                              |
| LCCH-89  | ADC       | wt                    |                              | wt                           | mut                | c.34 G>T/p.G12C              |                              |
| LCCH-93  | ADC       | wt                    |                              | wt                           | mut                | c.34 G>T/p.G12C              |                              |
| LCCH-154 | SqCC      | wt                    |                              | wt                           | mut                | c.35 G>T/p.G12V              |                              |
| LCCH-156 | ADC       | wt                    |                              | wt                           | mut                | c.35 G>T/p.G12V              |                              |
| LCCH-473 | ADC       | wt                    |                              | wt                           | mut                | c.34 G>T/p.G12C              |                              |

ADC, adenocarcinoma; SqCC, squamous cell carcinoma; wt, wild type; mut, mutated.
